# Supplementary material
Source: PubMed Central journal article supplement (PMC1937535)

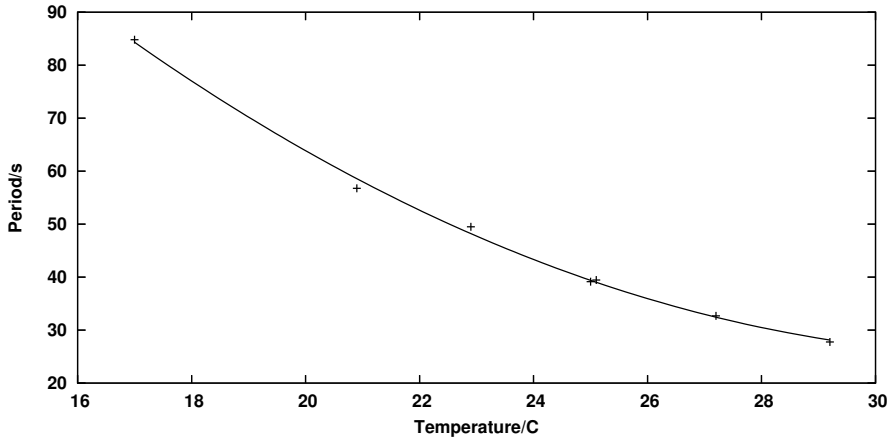

Supplement: pnas_0702560104_1.pdf [file pnas_0702560104_1.pdf]
